# Supplementary material
Source: publisher site journal article supplement (https://www.spandidos-publications.com/6687/downloadSupplementary)
Supplement: Supplementary file 1 [file downloadSupplementary]

## Sheet: Table S2
Table SII. Differentially expressed genes associated with lung tumorigenesis.
Genes	Regulation
NECTIN4	Up
HMGB3	Up
FAM83A	Up
ABCC3	Up
PROM2	Up
LINC01426	Up
ETV4	Up
MROH6	Up
PYCR1	Up
HS6ST2	Up
PODXL2	Up
SYT12	Up
PLPP2	Up
SPINK1	Up
FUT2	Up
CXCL14	Up
ABCA4	Up
SGPP2	Up
SERINC2	Up
XDH	Up
B3GNT3	Up
ARHGEF19	Up
SPP1	Up
IL37	Up
GPT2	Up
EFNA4	Up
SPTBN2	Up
COL10A1	Up
MUC3A	Up
WFDC2	Up
EPHA10	Up
GOLM1	Up
MUC21	Up
KRT80	Up
KRT15	Up
EPN3	Up
PRR36	Up
NPTX1	Up
CILP2	Up
SBK1	Up
LCAL1	Up
RHBDL2	Up
STK39	Up
LINC00673	Up
SLC2A1	Up
CRABP2	Up
RCC1	Up
GGCT	Up
SLC50A1	Up
COMP	Up
FGF11	Up
GOLGA7B	Up
EEF1A2	Up
SLC25A10	Up
LARGE2	Up
TOX3	Up
TMEM63C	Up
PHLDA2	Up
TMPRSS4	Up
SPDEF	Up
SLC35F3	Up
GRHL3	Up
S100A2	Up
ARHGAP40	Up
METTL7B	Up
MAPK13	Up
CBLC	Up
ZDHHC9	Up
SYT16	Up
BLACAT1	Up
OCIAD2	Up
CA10	Up
PC	Up
MMP11	Up
KRT17	Up
FEZF1-AS1	Up
LAD1	Up
STEAP3	Up
CCNF	Up
MUC20	Up
ADGRF1	Up
ENO1	Up
RTN4RL2	Up
PLEKHN1	Up
SDC1	Up
GPX2	Up
LOC112694756	Up
PTK7	Up
MMP12	Up
FRMD5	Up
MEX3A	Up
BARX2	Up
KCNK5	Up
ALDH3A1	Up
TRAF4	Up
SCUBE3	Up
PAX7	Up
ST14	Up
SEMA4B	Up
SLC29A4	Up
RGS17	Up
SRD5A3	Up
IVL	Up
SYT2	Up
IQANK1	Up
BCL2L15	Up
B3GNT6	Up
SPRR1B	Up
KRT16	Up
MMP9	Up
BARX1	Up
TLCD1	Up
MANEAL	Up
GJB6	Up
ST6GALNAC1	Up
CLIC6	Up
WNT7B	Up
SFN	Up
KRT6A	Up
HABP2	Up
KRT14	Up
B3GAT1-DT	Up
LAPTM4B	Up
MDK	Up
GJB2	Up
CEACAM7	Up
CDH3	Up
MFSD4A	Up
HMGA1	Up
CD24	Up
RNF212	Up
LYPD1	Up
DLX3	Up
SERPIND1	Up
LRIG3	Up
ZNF750	Up
HOXD1	Up
SAPCD2	Up
GLB1L2	Up
PVT1	Up
TFAP2C	Up
TONSL	Up
FAM83H	Up
GLB1L3	Up
GCNT3	Up
SRCIN1	Up
AMY1A	Up
KRT5	Up
ALB	Up
STK32A	Up
DPP4	Up
JPT2	Up
SALL4	Up
THBS4	Up
TFAP2A	Up
MESP1	Up
MMP13	Up
TMEM105	Up
CLDN4	Up
CCNJL	Up
MMP7	Up
COL17A1	Up
AQP3	Up
IGSF9	Up
ACAD8	Up
MYBL2	Up
TK1	Up
PPP1R14B	Up
EPHX3	Up
PCP4	Up
BDH1	Up
CP	Up
MSL3P1	Up
LOC105447645	Up
PLEKHG6	Up
PODNL1	Up
FEZF1	Up
UNC5CL	Up
SAMD10	Up
ALDH3B2	Up
GPR160	Up
ADAM8	Up
ADM2	Up
GYG2	Up
PANX2	Up
DNAH14	Up
SCGB3A1	Up
ABCA12	Up
FNDC10	Up
DMRTA2	Up
MAP7D2	Up
CLDN6	Up
ATP10B	Up
PAFAH1B3	Up
NECTIN1	Up
TMEM92	Up
SLC22A18	Up
CIT	Up
GRHL1	Up
LY6D	Up
RASAL1	Up
SIX1	Up
EFNA3	Up
FUT3	Up
LINC00942	Up
SUSD4	Up
CRYM	Up
ARHGEF16	Up
HPS3	Up
BCAS4	Up
NKX1-2	Up
CLDN3	Up
GOLGA2P11	Up
TNFRSF12A	Up
BZW2	Up
ONECUT1	Up
SOWAHB	Up
CST1	Up
ADORA2B	Up
UBE2C	Up
H2BC5	Up
AKR1B10	Up
REEP6	Up
FAT2	Up
PRSS22	Up
LRRC8E	Up
RHPN1	Up
PITX1	Up
NT5E	Up
PIGR	Up
EPHB2	Up
KCNQ3	Up
NRIP3	Up
TUBB3	Up
OVOL1	Up
TNS4	Up
KCNK1	Up
ANKRD22	Up
EEF1AKMT4	Up
WDR62	Up
TMEM132A	Up
TFR2	Up
FERMT1	Up
KISS1R	Up
KRT13	Up
CDC20	Up
KIF26B	Up
EGLN3	Up
AFAP1-AS1	Up
CLDN10	Up
ITPKA	Up
SALL1	Up
KRT6B	Up
ITGA11	Up
SERPINB5	Up
FADS6	Up
GPR87	Up
BUB1B-PAK6	Up
TP63	Up
VTCN1	Up
BEAN1	Up
GJB1	Up
GBP6	Up
DGCR5	Up
GSDMC	Up
PRSS1	Up
BIRC5	Up
F2RL1	Up
ATP1B1	Up
ARSH	Up
LINC01977	Up
SIX4	Up
PCSK1N	Up
TXNDC17	Up
CNMD	Up
PABPC1L	Up
NUP210L	Up
KIAA1522	Up
GFRA3	Up
CD207	Up
P2RY6	Up
CPNE7	Up
SIX2	Up
KCNQ5	Up
PGLYRP3	Up
PERM1	Up
KCNN4	Up
TBXT	Up
CALB1	Up
FCGBP	Up
CALML3	Up
IL36RN	Up
B4GALNT3	Up
LINC02159	Up
CDCA8	Up
NMRAL2P	Up
EPCAM	Up
XAGE1A	Up
NQO1	Up
ORC6	Up
TERT	Up
LRRC15	Up
MACC1	Up
PTHLH	Up
RBBP8NL	Up
CDKN2A	Up
CRLF1	Up
B4GALNT4	Up
KLHDC8A	Up
CABYR	Up
TEDC2	Up
SPRR3	Up
ATG9B	Up
GRIP1	Up
PGLYRP4	Up
MESP2	Up
CYP24A1	Up
ERO1A	Up
LOC100128770	Up
CAPN8	Up
SYT7	Up
SLC24A2	Up
PKMYT1	Up
DDR1	Up
XPR1	Up
LOC105369201	Up
LINC02036	Up
DSG3	Up
STRA6	Up
CCNB2	Up
INAVA	Up
UGT1A6	Up
ESPN	Up
TRPM8	Up
MYO3B	Up
POU2F3	Up
UBE2T	Up
MMP10	Up
EN2	Up
STX1A	Up
GINS2	Up
AOC1	Up
FBXL16	Up
SLC2A5	Up
ENTPD8	Up
SPRR2D	Up
TNFRSF21	Up
GRIK2	Up
LGALS7B	Up
CCNB1	Up
PON1	Up
LEMD1	Up
LOC117779438	Up
ZNF486	Up
RAC3	Up
CLTRN	Up
TMPRSS13	Up
SLC25A48	Up
GDF15	Up
SORD	Up
NXPH4	Up
HORMAD1	Up
PRR4	Up
DLGAP5	Up
VMP1	Up
TDRKH	Up
ANLN	Up
CLDN9	Up
CEACAM6	Up
NME1	Up
HTR3A	Up
ETNK2	Up
CNGA1	Up
LNCDAT	Up
ADH7	Up
CSMD2	Up
CHAF1B	Up
AGR2	Up
LINC00964	Up
ABHD11	Up
SCGB3A2	Up
PCP4L1	Up
OTX1	Up
ABCC6P2	Up
ALG1L	Up
LYPD3	Up
MNX1	Up
CD1A	Up
XAGE1B	Up
PLK1	Up
HAGLR	Up
VSTM2L	Up
CKS1B	Up
IYD	Up
BICDL2	Up
CHAD	Up
LOC101927136	Up
LRRC31	Up
MPZL2	Up
ADAM12	Up
LINC02560	Up
KRT19	Up
LSR	Up
IBSP	Up
C1orf53	Up
TMEM59L	Up
DRGX	Up
CHAT	Up
GLS2	Up
SOX4	Up
KRT6C	Up
PCAT6	Up
CPA6	Up
TOP2A	Up
NCCRP1	Up
CDT1	Up
NEK2	Up
KDELR3	Up
ACHE	Up
SOST	Up
HJURP	Up
CTHRC1	Up
AURKB	Up
LINC01833	Up
FOXA3	Up
TTK	Up
TMPRSS11E	Up
RECQL4	Up
CLDN1	Up
SLC15A1	Up
C2CD4A	Up
TMEM45B	Up
SLC7A11	Up
DEPTOR	Up
CDCA7	Up
COL22A1	Up
APCDD1L	Up
GPR37	Up
BAIAP2L1	Up
SERPINE2	Up
PLEK2	Up
COL9A2	Up
KLC3	Up
GPR39	Up
FOXE1	Up
NHS	Up
DLL3	Up
FOXI3	Up
ZPLD1	Up
MUC1	Up
STAP2	Up
CYP27C1	Up
COL11A1	Up
UMODL1	Up
MIR205HG	Up
RNF43	Up
HKDC1	Up
PLAC1	Up
CTSE	Up
LOC105373159	Up
PTPRH	Up
ITPRID1	Up
ZNF322	Up
PITX2	Up
ATP6V0A4	Up
LINC02014	Up
UHRF1	Up
GREM1	Up
LINC00896	Up
MFAP2	Up
UGDH	Up
SMIM22	Up
ZNF695	Up
TUBA1C	Up
RMI2	Up
LINC01559	Up
MCM2	Up
KRT1	Up
LOC102724562	Up
RAP1GAP	Up
PDIA2	Up
ERCC6L	Up
GPRIN1	Up
RRM2	Up
BIK	Up
HHIPL2	Up
SPRR1A	Up
COL1A1	Up
DLX5	Up
RHBDL1	Up
ESRP1	Up
LINC00319	Up
BMP3	Up
HOXC11	Up
RAB26	Up
CLDN2	Up
ZSCAN4	Up
LINC00461	Up
UGT2B15	Up
SKA1	Up
UCA1	Up
FAP	Up
CAPN13	Up
CLEC5A	Up
STYK1	Up
PTTG1	Up
BRIP1	Up
EPYC	Up
HOMER2	Up
NELL1	Up
RDH10	Up
B3GAT1	Up
MAL2	Up
CDC45	Up
MND1	Up
UGT1A7	Up
PLAAT1	Up
KIF20A	Up
LINC00578	Up
CDCA5	Up
NUSAP1	Up
MIF	Up
RHOV	Up
PKHD1	Up
PKP3	Up
MMP17	Up
BUB1	Up
IL1RL2	Up
UCN3	Up
SPSB1	Up
BMP8A	Up
YBX2	Up
LINC01123	Up
MYBPH	Up
XKRX	Up
CYP4F11	Up
LINC00624	Up
ABCB6	Up
SLC44A3-AS1	Up
PPP2R2C	Up
PRR19	Up
CEP55	Up
HOXC10	Up
PTPRN	Up
SLC1A7	Up
MNX1-AS1	Up
TMC5	Up
DNAJC25-GNG10	Up
SPAG5	Up
LINC02535	Up
KIF2C	Up
THBS2	Up
TPX2	Up
IGFBPL1	Up
FBXO16	Up
SLCO1B3	Up
DBNDD1	Up
ASS1	Up
ELFN2	Up
KRT8	Up
CDC25C	Up
TRIM2	Up
PAX9	Up
SLAMF9	Up
SPC24	Up
KRTCAP3	Up
DIRAS1	Up
C11orf86	Up
MST1L	Up
FA2H	Up
DUSP9	Up
E2F8	Up
TGFA	Up
SMPDL3B	Up
HMGA2	Up
HGD	Up
EXO1	Up
SNHG3	Up
PCLAF	Up
ERFL	Up
DSP	Up
SLC39A4	Up
EDN2	Up
DPP10-AS1	Up
MCM4	Up
PADI1	Up
HECW1	Up
TIMP1	Up
IL4I1	Up
MYOSLID	Up
RAB25	Up
HILPDA	Up
CELSR3	Up
PLPP4	Up
GDA	Up
SLC6A3	Up
EPHA1	Up
FOXO6	Up
AKR1C2	Up
H2AC17	Up
CAMK2B	Up
AURKA	Up
SERPINB13	Up
ADAMTS16	Up
S100A11	Up
FAM83B	Up
GOLGA6L9	Up
ACSL5	Up
POM121L8P	Up
LINC01614	Up
FAM83F	Up
ENTPD3	Up
ADGRF4	Up
FOXM1	Up
LINC01436	Up
IGFL2-AS1	Up
CCNA2	Up
GS1-594A7.3	Up
TROAP	Up
PSMG3	Up
KPNA2	Up
FUT6	Up
KCNK12	Up
LINC00460	Up
PTGR1	Up
AKR1C1	Up
KCNQ2	Up
GJB3	Up
SEZ6L2	Up
GJB5	Up
C11orf80	Up
TNFSF15	Up
LINC00511	Up
GSTA1	Up
CDH1	Up
CEACAM1	Up
CYP26A1	Up
WDR86	Up
ELF3-AS1	Up
C15orf48	Up
WNT3	Up
NHLRC1	Up
CCNE2	Up
LGSN	Up
HNF4G	Up
SPAG4	Up
ERN2	Up
GINS1	Up
MALL	Up
SLC30A3	Up
PPP1R14B-AS1	Up
CRYGN	Up
KDF1	Up
BAAT	Up
DPP10	Up
TGFBR3L	Up
CCDC185	Up
EHF	Up
PLAU	Up
MARVELD3	Up
BUB1B	Up
ACY3	Up
EGF	Up
RASGEF1A	Up
PROC	Up
MYEOV	Up
PBK	Up
RHOD	Up
FAM178B	Up
COL7A1	Up
SLC7A10	Up
HOOK1	Up
COL3A1	Up
MELK	Up
EME1	Up
IQGAP3	Up
TFAP2A-AS2	Up
MUCL1	Up
ILDR1	Up
VSIG1	Up
CEL	Up
ANO9	Up
LOC389602	Up
PPFIA4	Up
IGSF11	Up
PON3	Up
WDR72	Up
FHL2	Up
CLDN10-AS1	Up
CDC25A	Up
PRSS16	Up
IRF6	Up
XRCC2	Up
SLC6A8	Up
CPNE4	Up
BCAT1	Up
TMEM88B	Up
GRIN2D	Up
MCHR1	Up
GRHL2	Up
NUF2	Up
A2ML1	Up
TM4SF4	Up
POLQ	Up
NKX2-2	Up
SPRR2A	Up
CHI3L1	Up
ONECUT2	Up
CDC6	Up
SLCO5A1	Up
PDLIM4	Up
TTC22	Up
MFSD6L	Up
DEPDC1	Up
STEAP3-AS1	Up
TRIP13	Up
SFRP4	Up
EYA2	Up
ASF1B	Up
GAPDH	Up
EZH2	Up
FAXC	Up
LY6K	Up
CELF5	Up
CENPA	Up
LOC100288175	Up
RNF225	Up
USH1G	Up
TRIM16L	Up
RNF157-AS1	Up
EPPK1	Up
FOXB1	Up
GAL	Up
TICRR	Up
LINC01270	Up
ARHGAP8	Up
RAD54L	Up
RAB19	Up
SPP2	Up
MTFP1	Up
CD180	Up
TTR	Up
NR0B1	Up
RAET1L	Up
KIF18B	Up
TLX2	Up
LGR4	Up
IL11	Up
TRPV6	Up
GREB1	Up
ECT2	Up
H1-2	Up
ERBB3	Up
HSPB1	Up
LINC01644	Up
CNFN	Up
DLX6	Up
CCNE1	Up
MKI67	Up
ESPNP	Up
LOC101929532	Up
CLCF1	Up
GTSE1	Up
ZP3	Up
CENPF	Up
TENM4	Up
KISS1	Up
CKM	Up
SALRNA1	Up
FAM131C	Up
BNIP5	Up
TMIGD3	Up
C6orf58	Up
SKA3	Up
RDH16	Up
FOXP3	Up
CYP2S1	Up
HHLA2	Up
IGFL1	Up
MROH3P	Up
PRR7	Up
LINC01271	Up
CIART	Up
KRT32	Up
DIO2	Up
LINC01547	Up
ADAM28	Up
SLC4A11	Up
KREMEN2	Up
MMP3	Up
DRAIC	Up
LOC344967	Up
PTGES	Up
CBR3-AS1	Up
PRC1	Up
IGLON5	Up
HOXC13	Up
GSDMB	Up
PTK6	Up
LOC107985532	Up
COL6A4P2	Up
AMTN	Up
CLSPN	Up
PCCA-DT	Up
MKRN2OS	Up
CA13	Up
NRK	Up
TNNC2	Up
C19orf48	Up
PERP	Up
CTRB2	Up
SLC44A5	Up
TFAP2A-AS1	Up
LRRC52-AS1	Up
SUGCT	Up
RLN3	Up
KIF11	Up
TRIM46	Up
CAPNS2	Up
TXN	Up
H2AC18	Up
OPRD1	Up
SRMS	Up
MYBPC2	Up
HMMR	Up
KIF4A	Up
FAM83C	Up
KIF12	Up
DNASE1	Up
CDK1	Up
LINC02888	Up
IGF2BP3	Up
PRSS3P2	Up
LOC102725072	Up
CYP2D6	Up
MAST1	Up
PKIB	Up
PRSS50	Up
FAM111B	Up
SLC52A1	Up
PSAT1	Up
DSG2	Up
ZFR2	Up
GABRA3	Up
SLC12A8	Up
ADAMTS14	Up
EMC3-AS1	Up
ZFPM2-AS1	Up
ZWINT	Up
ECM1	Up
LOC729966	Up
GDNF	Up
SRRM3	Up
FGFR3	Up
SPTB	Up
LOC101929705	Up
ESPL1	Up
RAB3B	Up
LPO	Up
ESCO2	Up
NGEF	Up
IGSF9B	Up
SLC6A19	Up
FZD9	Up
LOC101927318	Up
WFDC10B	Up
RHCE	Up
TMEM184A	Up
RNF39	Up
ANKRD34B	Up
ALDOA	Up
LNCOC1	Up
LINC00467	Up
PABPC1L2B	Up
MOGAT2	Up
GNG4	Up
WNK2	Up
ORC1	Up
PIP5KL1	Up
SPOCK1	Up
MELTF	Up
DARS-AS1	Up
ELF3	Up
KIFC1	Up
PKP1	Up
DAPL1	Up
COL5A1	Up
FOXA1	Up
H4C15	Up
FAM3B	Up
KRT31	Up
AK4	Up
WFDC3	Up
POU3F2	Up
SERPINB2	Up
CBR1	Up
TFF3	Up
TNC	Up
CEACAM5	Up
DNAH11	Up
MAD2L1	Up
CES3	Up
SOX1	Up
LOC728178	Up
SLC6A18	Up
HAS3	Up
TRPV4	Up
LOC728554	Up
ALPK2	Up
GPC1	Up
LOC101927911	Up
KRT16P1	Up
PTPRZ1	Up
MX2	Up
PLA2G10	Up
TMPRSS11D	Up
TAS2R1	Up
CLVS1	Up
KPNA7	Up
CA9	Up
PLA2G2F	Up
KRT18	Up
NETO1	Up
RFLNA	Up
KRT16P3	Up
LOXL4	Up
CRISPLD1	Up
TMEM61	Up
COLCA1	Up
PLEKHG4B	Up
APOH	Up
SLC47A2	Up
CDH15	Up
AKR1C3	Up
CLEC3A	Up
FAM226A	Up
FAM226B	Up
SGO1	Up
LRAT	Up
TCN1	Up
UBE2U	Up
PLOD2	Up
RAD51	Up
S100B	Up
CCDC150	Up
SOX21	Up
UPK3A	Up
NCAPH	Up
STIL	Up
LMNB1	Up
RUNDC3A-AS1	Up
SPINK13	Up
DQX1	Up
MXRA5	Up
CDCA2	Up
CACNA1I	Up
KRT10	Up
SHISA8	Up
CYP2J2	Up
CKAP2L	Up
CCN4	Up
EVADR	Up
WNT4	Up
DCST2	Up
TYMS	Up
KRTAP2-3	Up
DEPDC1B	Up
LOC101929555	Up
KRT16P2	Up
SPRED3	Up
KLHDC7A	Up
ARSL	Up
IGFBP2	Up
CERNA2	Up
OR7E14P	Up
ZNF165	Up
GAD1	Up
TAC4	Up
CDKN3	Up
COL28A1	Up
ASPHD1	Up
PRR32	Up
LYPD6B	Up
TRPM5	Up
SOX2	Up
ENPP3	Up
LOC101929188	Up
GDPD2	Up
E2F7	Up
SLC25A21	Up
DUXAP9	Up
SLFN13	Up
CENPM	Up
LINC00519	Up
PPP1R14D	Up
TM4SF1-AS1	Up
UQCRBP1	Up
ELMO3	Up
EFNA2	Up
CENPU	Up
ARHGEF38	Up
SNHG4	Up
GOLT1A	Up
DOK5	Up
MIR210HG	Up
INA	Up
SOX15	Up
LINC01449	Up
GRIN1	Up
C2CD4D	Up
KCNK2	Up
CDH4	Up
OIP5	Up
ANGPTL4	Up
FAR2P1	Up
TFAP2D	Up
IL22RA2	Up
AQP5	Up
SHOC1	Up
GEMIN8P4	Up
BPIFB4	Up
SLC16A8	Up
AZGP1	Up
C2CD6	Up
CALML3-AS1	Up
PLD5	Up
TRIM51EP	Up
TUBB2B	Up
MAGED4	Up
CENPL	Up
FLRT1	Up
LOC730338	Up
SAMD12-AS1	Up
P4HA3	Up
LINC01106	Up
LINC02257	Up
KIF23	Up
LGALS7	Up
MUC4	Up
SLC44A4	Up
C10orf99	Up
LINC00858	Up
CATSPERB	Up
CST2	Up
E2F2	Up
SEPTIN3	Up
ARNTL2	Up
CNTNAP2	Up
SYT14	Up
C4orf19	Up
NEFL	Up
SLC29A2	Up
RAMP1	Up
IL17REL	Up
HSF2BP	Up
STK32A-AS1	Up
CCSER1	Up
BCL11A	Up
MCM10	Up
CERCAM	Up
TBX15	Up
CFB	Up
SHOX2	Up
LOC101928269	Up
LOC105374378	Up
S100A9	Up
NDC80	Up
VSX1	Up
SBSN	Up
ADAMDEC1	Up
CLCA2	Up
GINS4	Up
ASPM	Up
KRT86	Up
DNAJC12	Up
CYP27B1	Up
WASIR2	Up
HNF1B	Up
LINC01132	Up
C1QTNF6	Up
RHCG	Up
NPSR1-AS1	Up
TMPRSS11A	Up
HOXC13-AS	Up
HPN	Up
NCAPG	Up
G6PD	Up
RHPN1-AS1	Up
KIF14	Up
ITGB8	Up
ARTN	Up
GLRA3	Up
PMAIP1	Up
CCDC167	Up
IL36G	Up
HLA-DOB	Up
TDRD5	Up
CCL19	Up
LRRC26	Up
COX6B2	Up
LINC00482	Up
PDK1	Up
TEKT5	Up
FETUB	Up
ALK	Up
CCNP	Up
BCO1	Up
LRP8	Up
FER1L5	Up
EGOT	Up
CXCL17	Up
ACTBL2	Up
CCNO	Up
TNFRSF6B	Up
FAM221B	Up
MMP8	Up
EPS8L1	Up
CERS3	Up
ST8SIA2	Up
PRR15L	Up
NKAIN1	Up
MINAR1	Up
ZYG11A	Up
FAM83A-AS1	Up
CTSLP2	Up
FCRL2	Up
PRSS3	Up
CSPG5	Up
H4C8	Up
MIR663AHG	Up
CNTNAP4	Up
LINC00884	Up
CELF3	Up
ALOX12P2	Up
PRB3	Up
NEXMIF	Up
SCTR	Up
LINC01607	Up
S100A14	Up
CILP	Up
LOC105377342	Up
NKX3-2	Up
DOC2A	Up
RHBG	Up
COL5A2	Up
KRT78	Up
LCN2	Up
PIMREG	Up
KRT81	Up
RGS20	Up
PRSS8	Up
GALNT14	Up
C4orf48	Up
NEIL3	Up
STMN2	Up
CALML5	Up
RCN3	Up
SCUBE2	Up
TMPRSS6	Up
MYBPHL	Up
CEMIP	Up
HMGN2P46	Up
LOC108783645	Up
OPRK1	Up
PAX3	Up
CASC9	Up
AKR7A3	Up
WNT5A	Up
LILRB4	Up
TNNT1	Up
TMEM75	Up
SPTSSB	Up
COL2A1	Up
KIF18A	Up
IGFBP3	Up
UPK1B	Up
SGK2	Up
UCN2	Up
LRRTM1	Up
SLC17A8	Up
LOC339862	Up
PLA2G2C	Up
CNNM1	Up
PRAME	Up
LINC02532	Up
MIR31HG	Up
DPYSL4	Up
KRT83	Up
PIK3CD-AS2	Up
LINP1	Up
PPM1J	Up
LINC00880	Up
ZNF117	Up
KRT3	Up
PNMA6A	Up
DLX4	Up
KLK6	Up
PTCSC3	Up
HP	Up
H2BC4	Up
SULF1	Up
TUBBP5	Up
MIR3142HG	Up
AKR1B15	Up
SMIM1	Up
PCSK4	Up
BPIFC	Up
RAD51AP1	Up
HOXA13	Up
OXT	Up
ZNF280B	Up
GJA3	Up
HAGLROS	Up
HLA-G	Up
SNX29P1	Up
SLC9A3-AS1	Up
IGLL5	Up
CKMT1A	Up
SRSF12	Up
TRIM54	Up
GHET1	Up
LINC00514	Up
APELA	Up
RNF186	Up
AUNIP	Up
MMP1	Up
PNCK	Up
OPCML	Up
MB	Up
LAMP5	Up
GRB14	Up
PXT1	Up
PTPRG-AS1	Up
TNFRSF18	Up
TF	Up
MUC5B	Up
IL13RA2	Up
CLCA4	Up
LINC01206	Up
H2BC18	Up
LOC101927870	Up
SLC2A14	Up
KRTAP5-1	Up
DSC3	Up
GABRE	Up
ATP4A	Up
XKR9	Up
CHMP1B2P	Up
GOLGA2P10	Up
GABRR1	Up
GABRQ	Up
GUCY1B2	Up
DPP4-DT	Up
KIF15	Up
ELAPOR1	Up
GGT6	Up
CHAC2	Up
HOTAIR	Up
FGF5	Up
MIOX	Up
DRP2	Up
SKOR2	Up
H2BC9	Up
KRTAP5-10	Up
LOC112267991	Up
TUBB8	Up
CTAGE7P	Up
PPP1R1B	Up
HLA-DQB2	Up
DPEP1	Up
RUFY4	Up
KBTBD12	Up
GAP43	Up
TSACC	Up
CDSN	Up
LOC339685	Up
LOC254896	Up
CD19	Up
LCT	Up
BLK	Up
HROB	Up
LINC01694	Up
AK5	Up
NGB	Up
PLA2G4D	Up
SOX21-AS1	Up
KNL1	Up
KLHDC7B	Up
DCAF12L2	Up
CACNA1B	Up
MIR646HG	Up
UBE2Q2P2	Up
TNFRSF13C	Up
C20orf197	Up
BPIFA2	Up
S100A1	Up
LOC101928674	Up
FOXD3-AS1	Up
CKMT1B	Up
CCL7	Up
CDCA3	Up
KEL	Up
CENPW	Up
LTF	Up
DLX6-AS1	Up
LINC02889	Up
TMEM52	Up
IL31RA	Up
CDK5R2	Up
FGL1	Up
KRTAP4-1	Up
MEGF11	Up
CENPK	Up
LINC01754	Up
PKLR	Up
TRIM29	Up
DUSP13	Up
KIAA1549L	Up
LOC400684	Up
SULT4A1	Up
STEAP1	Up
LINC00342	Up
TEX19	Up
FAM27E3	Up
H1-4	Up
TMEM40	Up
VPS9D1-AS1	Up
KCNJ10	Up
SRXN1	Up
LINC01012	Up
CBR3	Up
LINC00659	Up
KIF1A	Up
KRT77	Up
OGDHL	Up
CST4	Up
ISL1	Up
CGB5	Up
MCMDC2	Up
EMBP1	Up
HAMP	Up
DCST1	Up
H2BC7	Up
CCDC162P	Up
TRIM49C	Up
S100A7	Up
SLC28A1	Up
SMIM31	Up
H2AC8	Up
LINGO1	Up
H2BC8	Up
KCNH8	Up
SP8	Up
ZNF90	Up
CD79A	Up
DDX4	Up
ARX	Up
NMNAT2	Up
ADAMTS12	Up
LINC00440	Up
ARHGAP42-AS1	Up
DMBX1	Up
FAM217A	Up
POM121L10P	Up
PLXNB3	Up
LINC01297-DUXAP10-NBEAP6	Up
SPC25	Up
SOX14	Up
POF1B	Up
LINC00626	Up
LINC01767	Up
ZIC2	Up
CCDC169	Up
LRRC69	Up
LOC101929128	Up
SCAT8	Up
PLCH2	Up
PRSS45P	Up
UGT8	Up
PIP	Up
NPIPB3	Up
RGMB-AS1	Up
KRT7-AS	Up
NIPAL1	Up
LINC00707	Up
GPR84	Up
DMRTC1	Up
CHST6	Up
HEPHL1	Up
LOC100506098	Up
CDH20	Up
POU6F2	Up
LINC00885	Up
CFAP20DC	Up
SLC22A20P	Up
ARHGAP11A	Up
ACVR1C	Up
TTYH1	Up
LHX5	Up
FGFBP1	Up
VCAN	Up
LOC653712	Up
MC4R	Up
ACE2	Up
STK31	Up
ROR1-AS1	Up
GABBR2	Up
OTOP2	Up
LINC01226	Up
SMC1B	Up
C6orf141	Up
SLC6A15	Up
SRPK3	Up
H1-6	Up
CCN6	Up
MUC16	Up
LOC727751	Up
CGREF1	Up
AQP6	Up
UGT2A1	Up
LMO1	Up
ISG15	Up
FOXL2	Up
NPBWR1	Up
IFNE	Up
ZIC5	Up
FCRLA	Up
CACNG7	Up
ALKAL1	Up
TLR10	Up
PNOC	Up
EPHB1	Up
PCDHA1	Up
ALDH1A3	Up
COLCA2	Up
PRH2	Up
CHRNB3	Up
TEX55	Up
LGI2	Up
KTN1-AS1	Up
SCG2	Up
FUT5	Up
TMEM92-AS1	Up
GABRP	Up
SLC5A5	Up
LINC01583	Up
POU5F1	Up
LOC105377763	Up
AMBP	Up
LRRC52	Up
S100P	Up
MIR503HG	Up
SPINK5	Up
GPR82	Up
LOC105378949	Up
PMCH	Up
CASP1P2	Up
DAZL	Up
PACSIN1	Up
KCNG1	Up
LINC01829	Up
LANCL3	Up
PNMA3	Up
LINC01703	Up
MSLN	Up
ALDOB	Up
IGFL4	Up
CA12	Up
ABCC6P1	Up
LOC93429	Up
PRRT3-AS1	Up
ZG16B	Up
SLC18A3	Up
LINC01249	Up
KRT34	Up
SERPINB4	Up
ITIH6	Up
EMX1	Up
LINC01569	Up
SOX11	Up
DNAJC22	Up
ARL14	Up
LINC02054	Up
NPIPB12	Up
MST1P2	Up
COL1A2	Up
DNAJC5G	Up
CHODL	Up
GUCA1A	Up
KCNMB2-AS1	Up
HOXC9	Up
LINC02015	Up
SLC6A17	Up
NKAIN2	Up
ERV3-1-ZNF117	Up
KCNG2	Up
CTSV	Up
KRTAP5-2	Up
LOC100128340	Up
CNR2	Up
RALY-AS1	Up
NOXO1	Up
MS4A1	Up
KCNC2	Up
EPHA8	Up
NRAP	Up
C1QTNF12	Up
TFAP2B	Up
STXBP5L	Up
GRK1	Up
CECR7	Up
F12	Up
ANKRD18A	Up
LINC01605	Up
RIMS2	Up
LINC02003	Up
CELP	Up
ACAN	Up
RPS15AP10	Up
PTCHD1	Up
MCIDAS	Up
FER1L4	Up
TMEM132E	Up
BECN2	Up
CT83	Up
METTL11B	Up
CCNYL2	Up
ACKR2	Up
SYCE1L	Up
MANSC4	Up
CLCNKB	Up
KRT33B	Up
LOC100505938	Up
BPIFB2	Up
LINC00593	Up
CEACAM8	Up
NKPD1	Up
SERPINE1	Up
LHX2	Up
SLC26A5	Up
GCKR	Up
PRB1	Up
LUARIS	Up
SCT	Up
NMU	Up
UGT2A2	Up
HOXA10	Up
LOC100130111	Up
C10orf90	Up
TCL1A	Up
PACERR	Up
HNF1A-AS1	Up
CENPE	Up
STPG3-AS1	Up
MEIKIN	Up
LINC00668	Up
RNF183	Up
RGS7	Up
LINC01634	Up
GABRG2	Up
SLC2A1-AS1	Up
PURPL	Up
SLCO1B7	Up
DUXAP10	Up
CHRNA6	Up
OR7A5	Up
UBAC2-AS1	Up
APOBEC1	Up
SERPINB3	Up
GNG13	Up
CALML6	Up
SERPINB11	Up
MC5R	Up
LHFPL4	Up
BRDT	Up
SYT3	Up
PPP1R1C	Up
LOC102723730	Up
TRIM9	Up
P2RX5	Up
SYNPR	Up
TMEM179	Up
SYT8	Up
NR2E1	Up
LINC01572	Up
TRIM31	Up
PRB4	Up
SPRR2E	Up
SLCO1B3-SLCO1B7	Up
LOC100129175	Up
GGT2	Up
C5	Up
LINC02562	Up
GGTLC3	Up
LOC284930	Up
LINC02012	Up
DLK2	Up
CTAGE9	Up
ANKRD36C	Up
LOC112268068	Up
STRC	Up
PRDM13	Up
PRG2	Up
LINC01711	Up
LHCGR	Up
LUCAT1	Up
SMPX	Up
LINC02028	Up
PCDHGA8	Up
AMN	Up
C1QL2	Up
RNASE2	Up
PALM3	Up
SMOC1	Up
POU6F2-AS2	Up
PALMD	Down
ADRA1D	Down
GPC3	Down
TBX3	Down
FOXF1	Down
HOXA5	Down
GFOD1	Down
COL6A6	Down
INSC	Down
MASP1	Down
GRK5	Down
ASPA	Down
LHFPL6	Down
CTNNAL1	Down
EMCN	Down
SCN4B	Down
P2RY14	Down
TRPC3	Down
TRPC6	Down
THSD1	Down
IGSF10	Down
RHOJ	Down
PECAM1	Down
BMP6	Down
CYYR1	Down
PEAR1	Down
FGD5	Down
NOSTRIN	Down
ENPP2	Down
FOXF2	Down
LDB2	Down
STARD9	Down
AGTR1	Down
ZBED2	Down
LINC00968	Down
KLF14	Down
ANGPTL1	Down
STX11	Down
SAMD5	Down
ROBO4	Down
SYNM	Down
SPAAR	Down
VWF	Down
ID3	Down
CAV1	Down
FZD4	Down
MMRN2	Down
TTN	Down
ABCG2	Down
DIPK2B	Down
GNG11	Down
LAMC3	Down
C20orf202	Down
CLEC14A	Down
SEMA6D	Down
FHL1	Down
DENND2A	Down
PCAT19	Down
PPARGC1A	Down
TNXB	Down
SHANK3	Down
MGAT3	Down
CAVIN1	Down
ABLIM3	Down
S1PR1	Down
CASS4	Down
ADGRL2	Down
SPTBN1	Down
SPARCL1	Down
TSPAN18	Down
LOC100129434	Down
DACH1	Down
CDH5	Down
SPOCK2	Down
CCM2L	Down
PLCB4	Down
JAM2	Down
CDO1	Down
TBX2	Down
NPR1	Down
PALM2AKAP2	Down
AFAP1L1	Down
LRRN3	Down
FAM124A	Down
KCNK3	Down
LINC00607	Down
SBSPON	Down
WFDC1	Down
ABCB1	Down
ADAMTSL3	Down
FAM162B	Down
ID4	Down
KL	Down
RS1	Down
FGF2	Down
GRIA1	Down
RAPGEF4	Down
PTPRB	Down
NOVA2	Down
CAMK2N1	Down
ADARB2	Down
PTPN21	Down
CAMP	Down
PDE2A	Down
GIMAP8	Down
CCBE1	Down
FHL5	Down
ARHGEF15	Down
ZNF366	Down
PDE1C	Down
FAT3	Down
ANKRD20A12P	Down
HBB	Down
ARHGAP6	Down
ANO2	Down
AOC4P	Down
KANK4	Down
MYCT1	Down
PKNOX2	Down
CCDC178	Down
COLGALT2	Down
PGAP4	Down
MYH2	Down
CAV2	Down
HEG1	Down
ZNF331	Down
SVEP1	Down
PDE5A	Down
ACKR4	Down
BTNL9	Down
BCHE	Down
RASIP1	Down
TBX4	Down
ACVRL1	Down
SEMA6A	Down
KIF26A	Down
EDNRB	Down
SELP	Down
PRG4	Down
SLIT2	Down
GPA33	Down
DOK6	Down
ZNF536	Down
GIPC2	Down
LHX6	Down
TAL1	Down
NOTCH4	Down
BAALC	Down
SCUBE1	Down
LINC00472	Down
GPR17	Down
CCDC141	Down
CLEC1A	Down
RNF182	Down
GRIK4	Down
PHYHIPL	Down
LINC00622	Down
GBP4	Down
GHR	Down
LINC02154	Down
FABP4	Down
FRMD3	Down
ADAMTS9-AS1	Down
WWC2-AS2	Down
GFRA2	Down
AOC3	Down
GYPE	Down
KCNT2	Down
PDGFB	Down
ARHGEF26	Down
LYVE1	Down
ACE	Down
LINC00475	Down
SLIT3	Down
HSPA12B	Down
NTNG1	Down
LIN7A	Down
PTPRQ	Down
SLCO2A1	Down
CLIC5	Down
SMAD6	Down
SH2D3C	Down
SGCG	Down
HBA2	Down
NDRG4	Down
SEMA5A	Down
TRHDE-AS1	Down
GATA2	Down
LEPR	Down
BMX	Down
JPH4	Down
EMP2	Down
FMO2	Down
SASH1	Down
CACNA1S	Down
GJA4	Down
FAM189A1	Down
HBA1	Down
RSPO1	Down
AVPR2	Down
NES	Down
RADIL	Down
TLL1	Down
GPX3	Down
GOLGA8M	Down
CCDC85A	Down
ADCY4	Down
INMT	Down
LRCOL1	Down
CD93	Down
TEK	Down
CDH19	Down
MYRF	Down
MIR1915HG	Down
LOC105375304	Down
C10orf105	Down
GLDN	Down
AGAP11	Down
HYAL1	Down
LAMA3	Down
IL33	Down
LOC100507477	Down
MYZAP	Down
KCNK17	Down
MAMDC2	Down
TMEM178A	Down
ADRA1A	Down
ABI3BP	Down
FRAS1	Down
RGCC	Down
C1QTNF2	Down
STXBP6	Down
FENDRR	Down
HCAR2	Down
MMRN1	Down
LRRTM4	Down
ASTN1	Down
MYH1	Down
NR5A2	Down
MYRIP	Down
CHRNA4	Down
AOX1	Down
ABCA9	Down
NPY1R	Down
RTKN2	Down
KLHL33	Down
NKD1	Down
LOC90246	Down
PCDH17	Down
ADGRG6	Down
C21orf62	Down
PCDHA3	Down
LINC01996	Down
STARD8	Down
MAPK4	Down
BCL6B	Down
CT45A3	Down
LOC112268136	Down
SLITRK2	Down
NMUR1	Down
TGFBR3	Down
RSPO4	Down
DCC	Down
LPL	Down
PDZD2	Down
GUCY1A2	Down
GDF10	Down
HIGD1B	Down
VIPR2	Down
SLC5A9	Down
LRRC4B	Down
ABCA8	Down
LTBP4	Down
PREX2	Down
KIAA0087	Down
PDE7B	Down
RGS9	Down
MGAT4C	Down
TCF21	Down
RXFP1	Down
EFCC1	Down
MCEMP1	Down
NXPH3	Down
SFRP1	Down
LOC101929130	Down
QRFPR	Down
RAMP2	Down
ART4	Down
NCKAP5	Down
CAVIN2	Down
SEMA3G	Down
LIMS2	Down
CT45A7	Down
LOC101928370	Down
CASP5	Down
LOC107984282	Down
KCNMB4	Down
THRSP	Down
RAMP2-AS1	Down
ANGPT4	Down
EPAS1	Down
CCN5	Down
EPHA5	Down
PLAC9	Down
ADH1B	Down
PLCXD3	Down
CIDEA	Down
CHRM2	Down
GPM6A	Down
FREM3	Down
KCNT1	Down
RYR3	Down
SCHIP1	Down
LRRC2	Down
CCL14	Down
USHBP1	Down
LOC101928718	Down
NPR3	Down
ST8SIA6	Down
ACADL	Down
DNASE1L3	Down
C9orf129	Down
DPP6	Down
SH3TC2	Down
CALCRL	Down
LINC00671	Down
LIFR	Down
SERPINC1	Down
TARID	Down
DKK2	Down
GBP7	Down
CCL23	Down
DCDC2	Down
NR4A2	Down
FGF10	Down
SLC5A4	Down
TRHDE	Down
FSIP1	Down
LINC02880	Down
LINC01166	Down
C9orf153	Down
GJC2	Down
UPK3B	Down
FGFR4	Down
CLEC3B	Down
EYA4	Down
KCNB1	Down
LINC01081	Down
H2AC19	Down
CNTNAP3	Down
FIBIN	Down
GSG1L	Down
POU3F3	Down
AFF2	Down
HOXD9	Down
MEFV	Down
LOC105370708	Down
SFRP5	Down
SLC19A3	Down
CLEC4GP1	Down
SLC6A13	Down
CTXND1	Down
RAMP3	Down
VEGFD	Down
TENT5B	Down
ADGRB3	Down
PSAPL1	Down
NPY5R	Down
TAMALIN-AS1	Down
PDE6A	Down
SOX5	Down
SCN2B	Down
KLF4	Down
PCARE	Down
DLL4	Down
TM4SF18	Down
BEX1	Down
LRRTM2	Down
SCN7A	Down
CNTFR	Down
COX4I2	Down
EPHA5-AS1	Down
FRMPD4	Down
[truncated: 238 more rows]
